# Supplementary material for: Model-based whole-brain perturbational landscape of neurodegenerative diseases
Source: eLife. 2023 Mar 30;12:e83970. doi: 10.7554/eLife.83970 (PMC10063230; doi:10.7554/eLife.83970)
Supplement: Supplementary file 1. [file elife-83970-supp1.xlsx]

## Sheet: CN-COG
Codigo FONDECYT	Gender code 1:M, 2:F)	Age	Education	Laterality (1:right, 2: left)	moca_total	aceiii_total	mini_sea_fer	cdr_global
AR_F17_CN_101	2	69	20	1	28		12.42
AR_F17_CN_103	2	73	15	1	28		11.57
AR_F17_CN_104	2	68	15	1	28		13.71
AR_F17_CN_105	2	68	12	1
AR_F17_CN_106	1	58	15	1	25		12.42
AR_F17_CN_107	2	57	14	1	23		12
AR_F17_CN_108	2	77	18	1	29		12.85
AR_F17_CN_110	1	74	12	1	18		7.71
AR_F17_CN_111	2	51	18	1	30
AR_F17_CN_112	2	70	12	2	29		14.14
AR_F17_CN_113	1	63	12	1	28		11.14
AR_F17_CN_114	2	61	15	1	26		12.85
AR_F17_CN_115	1	65	18	1	27		10.28
AR_F17_CN_116	2	79	18	1	28		13.28
AR_F17_CN_117	2	76	20	1	25		11.57
AR_F17_CN_118	2	60	20	1	26		13.71
AR_F17_CN_119	2	55	18	2	27		10.28
AR_F17_CN_120	1	62	15	1	28		13.28
AR_F17_CN_121	1	55	18	1	25		11.57
AR_F17_CN_122	2	57	20	1	26		13.71
AR_F17_CN_123	2	83	18	1	25		13.71
AR_F17_CN_124	1	59	20	1	26
AR_F17_CN_125	2	74	18	1
AR_F17_CN_126	1	60	15	1	26		13.71
CH_F17_CN_101	1	72	12	1
CH_F17_CN_113	2	80	18	1
CH_F17_CN_114	2	72	10	1	23	86	11.571
CH_F17_CN_115	1	75	10	1	17	83	12.429
CH_F17_CN_116	1	76	15	1
CH_F17_CN_118	2	68	15	1
CH_F17_CN_119	1	64	18	1
CH_F17_CN_121	2	68	12	1
CH_F17_CN_122	2	73	8	1
CH_F17_CN_124	2	74	9	1
CH_F17_CN_126	1	76	3	1
CH_F17_CN_127	2	72	10	1	21	88	10.714
CH_F17_CN_128	1	74	7	1	24	90	11.571
CH_F17_CN_129	1	72	13	1	23	83	12
CH_F17_CN_130	2	78	18	1	29	92
CH_F17_CN_131	2	77	18	1	27	88
CH_F17_CN_132	2	77	20	1	29	93	12.429
CH_F17_CN_133	2	74	12	1	28	96	14.143
CH_F17_CN_134	2	80	18	1	30	99	14.625
CH_F17_CN_135	2	75	18	1	25	97	11.571
CH_F17_CN_136	2	77	12	1	25	90	11.571
CH_F17_CN_137	2	73	18	1	28	94	12.429
CH_F17_CN_138	1	80	15	1
CH_F17_CN_139	2	60	15	2
CH_F17_CN_140	2	63	12	1
CH_F17_CN_141	1	63	18	1
CH_F17_CN_142	1	62	20	1
CH_F17_CN_143	1	64	12	1
CH_F17_CN_144	2	61	13	1
CH_F17_CN_145	2	81	12	1
CH_F17_CN_146	2	74	15	1	27	89	12.857
CH_F17_CN_148	2	79	22	1	29	95	12
CH_F17_CN_149	2	81	10	1

## Sheet: AD-COG
Codigo FONDECYT	Gender code 1:M, 2:F)	Age	Education	Laterality (1:right, 2: left)	moca_total	aceiii_total	mini_sea_fer	cdr_global
AR_F17_AL_301	1	82	12	1	9		8.57
AR_F17_AL_302	1	79	9	1	22		11.57	1
AR_F17_AL_303	1	69	9	1	16		13.71	2
AR_F17_AL_304	2	70	7	1	13		9	2
AR_F17_AL_306	1	80	2	1	16		9	1
AR_F17_AL_307	2	81	7	1	21		12.42	1
AR_F17_AL_308	2	77	10	2	20		12
AR_F17_AL_309	2	79	3	1	14		10.71	0
AR_F17_AL_312	2	80	7	1	20		12	1
AR_F17_AL_313	2	68	18	1	21		11.57	1
AR_F17_AL_314	2	69	3	1	17		9.85	1
AR_F17_AL_315	2	67	7	1	11		8.57	2
AR_F17_AL_316	2	70	7	2	10		9.42	1
AR_F17_AL_317	1	82	12	2	16		8.57	0
AR_F17_AL_318	2	70	7	1	18		9	1
AR_F17_AL_319	2	80	1	1	14		12.42
AR_F17_AL_320	2	69	7	1	20		10.28
AR_F17_AL_323	2	75	5	1	13		7.28	0.5
CH_F17_AL_304	1	70	15	1	17	53	6
CH_F17_AL_307	1	77	21	1	16	81	10.286
CH_F17_AL_308	2	85	18	1	13	70	9.429
CH_F17_AL_309	1	74	6	1	6	43	8.571
CH_F17_AL_310	1	75	7	1	5	43	9
CH_F17_AL_311	2	81	12	1	15	57	11.143
CH_F17_AL_313	2	79	8	1	16	57	8.143
CH_F17_AL_314	1	86	12	1	14	63	6.429
CH_F17_AL_315	2	98	18	1	18	63	10.714
CH_F17_AL_316	2	76	12	1	18	77	12
CH_F17_AL_317	2	80	9	1	20	65	10.714
CH_F17_AL_319	2	69	12	1	19	69	10.286
CH_F17_AL_323	2	65	9	1	15	64	8.571	1
CH_F17_AL_326	2	64	18	1	21	82	12	0.5
CH_F17_AL_327	2	98	6	1	17	60	6	0.5
CH_F17_AL_328	2	73	12	1	22	87	14.143
CH_F17_AL_329	1	75	12	1	16	75	11.571	1
CH_F17_AL_330	1	77	18	1	8	37	0.429	3
CH_F17_AL_331	2	78	12	1	14	55	11.571	2
CH_F17_AL_306	2	81	13	1	15	56	10.286
CH_F17_AL_321	1	82	18	1	12	60	9

## Sheet: DFT-COG
Codigo FONDECYT	Gender code 1:M, 2:F)	Age	Education	Laterality (1:right, 2: left)	moca_total	aceiii_total	mini_sea_fer	cdr_global
AR_F17_DF_202	1	69	15	2	23		11.57	1
AR_F17_DF_206	1	57	14	1	15		6.85	2
AR_F17_DF_207	2	80	6	1	18		10.71	0
AR_F17_DF_208	1	78	21	1	27		9.85
AR_F17_DF_209	1	83	7	1	20		9.85	0.5
AR_F17_DF_212	1	58	18	1	27		13.71
AR_F17_DF_213	1	63	15	1	22		12
AR_F17_DF_214	2	65	18	1	30		13.71	3
AR_F17_DF_215	1	79	7	1	19		9
AR_F17_DF_216	1	60	18	1	26		10.71	1
AR_F17_DF_217	1	75	13	1				1
CH_F17_DF_201	1	59	8	1	19	81	9.857
CH_F17_DF_202	1	56	18	1	21	70	7.286	1
CH_F17_DF_203	2	72	18	1	25	76	8.571
CH_F17_DF_207	1	64	20	1	23	83	3.857	0.5
CH_F17_DF_208	1	58	9	1
CH_F17_DF_210	2	75	11	1	11	61	11.571	1
CH_F17_DF_211	1	42	18	1
